# Supplementary material
Source: PubMed Central journal article supplement (PMC3807429)
Supplement: JB.00731-13_zjb999092834so1.pdf [file JB.00731-13_zjb999092834so1.pdf]

**Supplemental material**

**Structure-function analysis of MurJ reveals a solvent-exposed cavity containing residues essential  
for peptidoglycan biogenesis in *Escherichia coli***

Emily K. Butler, Rebecca M. Davis, Vase Bari, Paul A. Nicholson, Natividad Ruiz

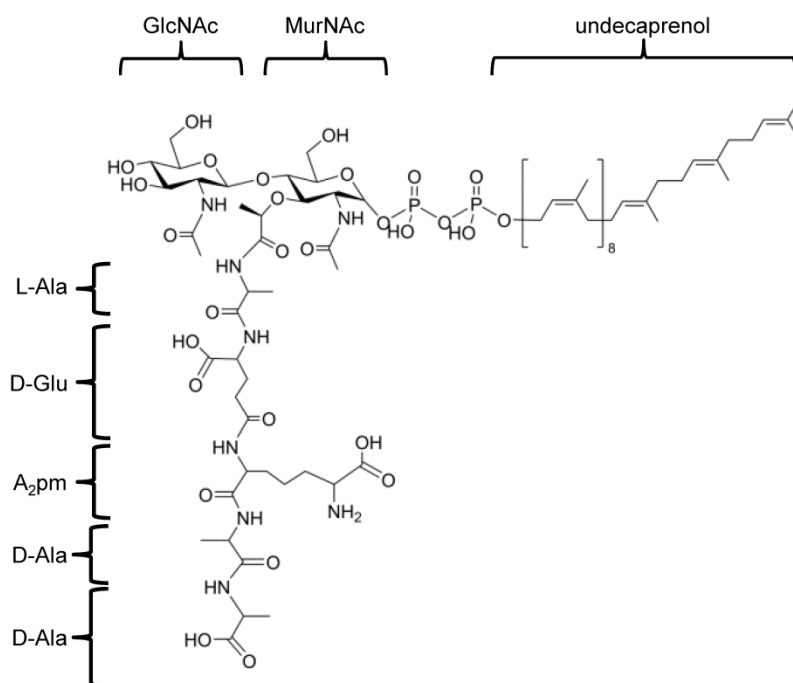

**FIGURE S1. Lipid II structure.** In the *E. coli* lipid II, the C55 isoprenoid carrier molecule undecaprenol is linked by a pyrophosphate to the disaccharide-pentapeptide moiety composed of GlcNAc, MurNAc, and the L-Ala- $\gamma$ -D-Glu-A<sub>2</sub>pm-D-Ala-D-Ala stem peptide. GlcNAc, *N*-acetylglucosamine; MurNAc, *N*-acetylmuramic acid; A<sub>2</sub>pm, *meso*-diaminopimelic acid.

**A**

```

MurJ/1-439      1  -----MNLKSL-----AAVSSMTMF-----16
PIMATE/1-461    1  MSEKTTKGVQLLRGDPKKAIVRLSIPMMIGMSVQTLYNLADGIWVSGLGPESLAAVGLFF 60

MurJ/1-439      17  -----SRVLFGRDAIVARIFGAGMATDA-----40
PIMATE/1-461    61  PVFMGIIALAAGLGGVTSSAIARRIGARDKEGADNVAVHSLILSLILGVTITITMLPAID 120

MurJ/1-439      41  -FFV-----AFKLPNLLRRIFAEGAFSQAIVPILAEYKSKQGEDATRVFVSVSGL-L 91
PIMATE/1-461    121  SLFRSMGAKGEVLAIEYARVLLAGAFIVENNVGNGILRGEG-DANRAMLAMVLSGL 179

MurJ/1-439      92  TL-----ALAVTVAGMLAAPVIMVTA PGFADTADKFAALTSQLL 131
PIMATE/1-461    180  NIVLDPIFIYTLGFGVGAAYATLLSVVTSLFIAYWLVFKRDYVVDITLRDPSREIL 239

MurJ/1-439      132  KITFPYILLISLASLVGAILNTWNRFSIPAFAPTL-LNISMID--GFALFAAPYFNPPVL 187
PIMATE/1-461    240  K-----DILRVGLPSSLSQLSMSIAMFFLNSVAITAGGENGVAVF 279

MurJ/1-439      188  ALAWAVTVGGVLLQLVYQLPHLKKIGMLVLPRI NFHDAGAMRVVKQMGPAILGVSVSQISL 247
PIMATE/1-461    280  TSAWRIITMLGIVPIL-----294

MurJ/1-439      248  IINTIFASFLASGSVSWMYADRLMEFSPGLGVALGTILLPSLSKSFASGNHDEYNRLM 307
PIMATE/1-461    295  -----GMAAAT--SVTGAAYGERNVEKLETA 320

MurJ/1-439      308  DWGLRLCFLLAIPSAVALGILSGPLTVSLFQYGFKFTAFD--ALMTQNALIAYS-VGLIG 363
PIMATE/1-461    321  LYAIKIAEMIEAVV-AFIMLFAPQVAYLFTYSESAQVIKGDILSALRTLPVFLVLTPEFG 379

MurJ/1-439      364  LIVVKVLA PGFYSRQDKTPVKIAIVTLILQLMNLAFIGP-----LKHAGLSL--SIG 415
PIMATE/1-461    380  M-----M TSAME--GGEGEKSLLTIFRLLVMQVGFAYIFVHYTTLGLREVWVIGIVIG 432

MurJ/1-439      416  LAACLNASLLYQLRKQKIFTPQP-----439
PIMATE/1-461    433  NMVAAIVG-FLWGRMRI SALKKTSATGGKR 461

```

**B**

```

MurJ/1-439      1  -----MNLKSLAAVSSMTMFSRVLFGFARDAIVARIFGAGMATDAFFVFAKLP 48
NorM-VC/1-461  1  MENSVHRYKKEASNLIKLATPWLIASVAQTGMGFVDTIMAGVSAIDMAAVSIAASIWLP 60

MurJ/1-439      49  NLLRRIFAEGAFSQAIVFILAIEYKSKQGEDATRVFVSVSGLLT-LALAVTVAGMLAAP 107
NorM-VC/1-461  61  SII---LFGVGLLMALVPVVAQLNGAGRQHK-IPF-EVHQQLILALLVSPPIAVLFTQT 114

MurJ/1-439      108  WVIMV-----TAPGF-----ADTAKFALTSQ-----LLK 132
NorM-VC/1-461  115  FIRFMVDVEEAMATKTVGYMHAVIFAVPAYLLFQALRSFTDGMSLTKPAMVIGFIGLLN 174

MurJ/1-439      133  ITFPYJLLIS-----LASLVGAILNTWNRFSIPA 161
NorM-VC/1-461  175  IPLNWFVYKFGAPELGGVCGVATAIVYWIMLLLLLFYIVTSKRLAHVKVFETLHKRQ 234

MurJ/1-439      162  FAPTLLNISMIGFALFAAPYFNPPVLAALAWAVTVGGVLLQLVYQLPHLKKIGMLVLPRI NF 221
NorM-VC/1-461  235  -PKE LIRLFRLGFVPAALFFEVTLFAVV-----ALLV-----266

MurJ/1-439      222  HDAGAMRVVKQMGPAILGVSVSQISLIINTIFASFLASGSVSWMYADRLMEFSPGLGV 281
NorM-VC/1-461  267  -----APL GSTVV-----AAHQVA-LNFS SSVLFMFPMSI-GA 296

MurJ/1-439      282  ALGTILLPSLSKSFASGNHDEYNRLMDWGLRLCFLALPSAVALGILSGPLTVSLFQY-- 339
NorM-VC/1-461  297  AVS-----IRVGHKLEEQDTKGAAI-----AANVGLMTGLATACITALLT 336

MurJ/1-439      340  GKFTAF-DALMTQR-AL IAYSVGL-----IGLIVKVLAPGFYS-RQDKTPVKIAIV 389
NorM-VC/1-461  337  VLREQIALLYTENQVVVALAMQLLLFAAIYQCMDAQVVAAGSLRGYKDMTAIFHRTFI 396

MurJ/1-439      390  -----TLITQLMNLAFIGPLKHAGL---SLSIGLAACLNASLYWQLRKQKIFTP 437
NorM-VC/1-461  397  SYWVLGLPTGYILGMTWLTEQPLGAKGFWLGFIIGLSAALMLGQRLYWQLKQSDDVQL 456

MurJ/1-439      438  QP---439
NorM-VC/1-461  457  HLA AK 461

```

C

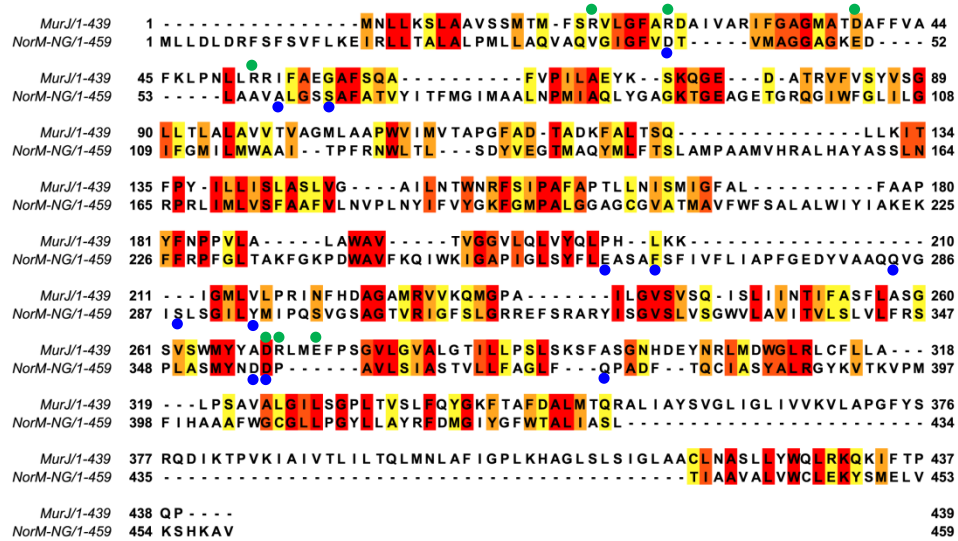

**FIGURE S2. Amino-acid sequence alignments of MurJ to MATE transporter proteins.** ClustalOmega (1) alignment of MurJ (NP\_415587) to **A)** PfMATE (Q8U2X0\_PYRFU), **B)** NorM-Vc (AAF94694), **C)** NorM-NG (YP\_005889265). MurJ sequence identity to these MATE proteins is 22.42%, 21.13%, and 21.87%, respectively. Conserved residues are highlighted in accordance with JalView (2) conservation scores (1 to 10), where yellow = 8, orange = 9, and red = 10. Green dots mark functionally relevant residues in MurJ; blue dots mark functionally relevant residues in the aligned MATE protein sequence (3-5).

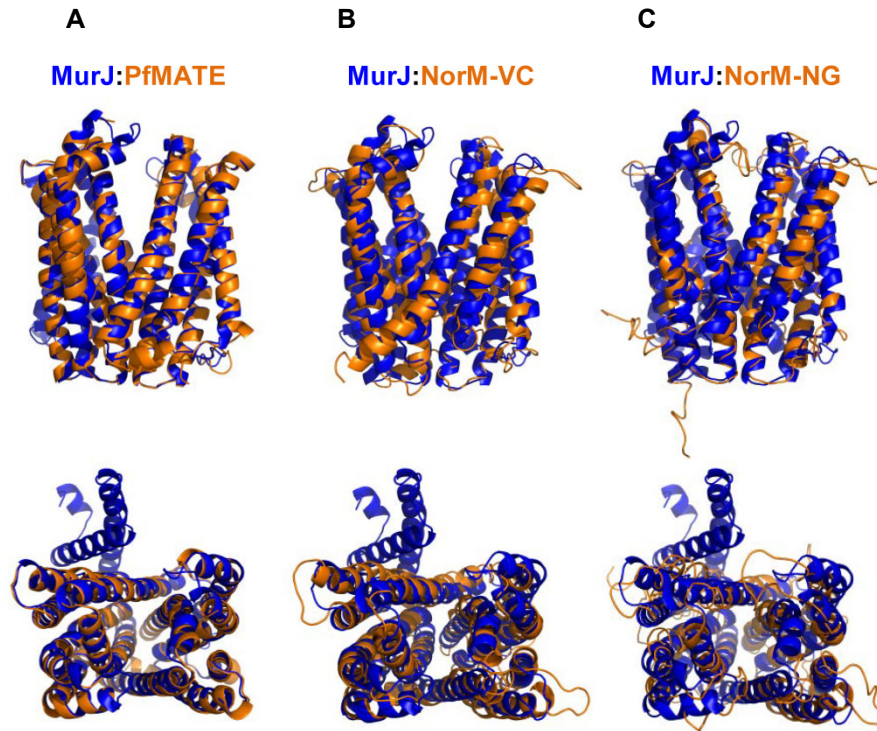

**FIGURE S3. I-TASSER structural model of MurJ is highly similar to the crystal structure of MOP exporter superfamily proteins.** Alignment of the full-length MurJ model structure generated by I-TASSER (blue) and the x-ray crystal structures (orange) of **A)** PfMATE (3VVN), **B)** NorM-VC (3MKU), and **C)** NorM-NG (4HUK) shows high degree of structural similarity throughout TMDs 1-12 (RMSD values of 0.72, 2.61, and 3.10 Å, respectively). Front view from the membrane plane is given at the top; view from the periplasm is given at bottom.

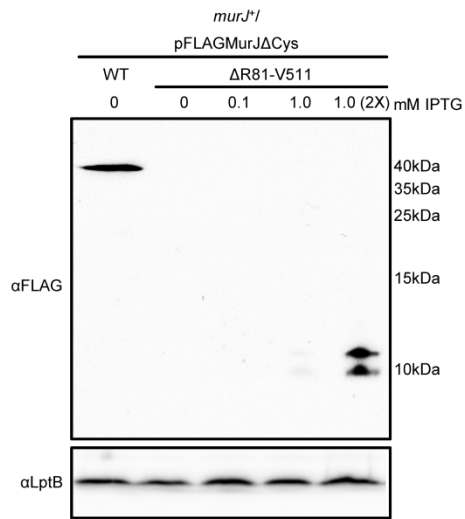

**FIGURE S4. A FLAGMurJΔCys fragment of residues 1-80 is unstable.** αFLAG immunoblot showing that while full-length FLAGMurJΔCys (WT) is easily detected when expressed in the wild-type strain (*murJ*<sup>+</sup>) without IPTG induction, a variant lacking residues R81-V511 is best detected after induction with 1.0 mM IPTG in a concentrated sample (2X). The truncated variant migrates aberrantly in an 18% polyacrylamide SDS gel (expected MW = 9.7kDa), and a degradation product is also detected. To test sample loading, blots were re-probed with αLptB antiserum.

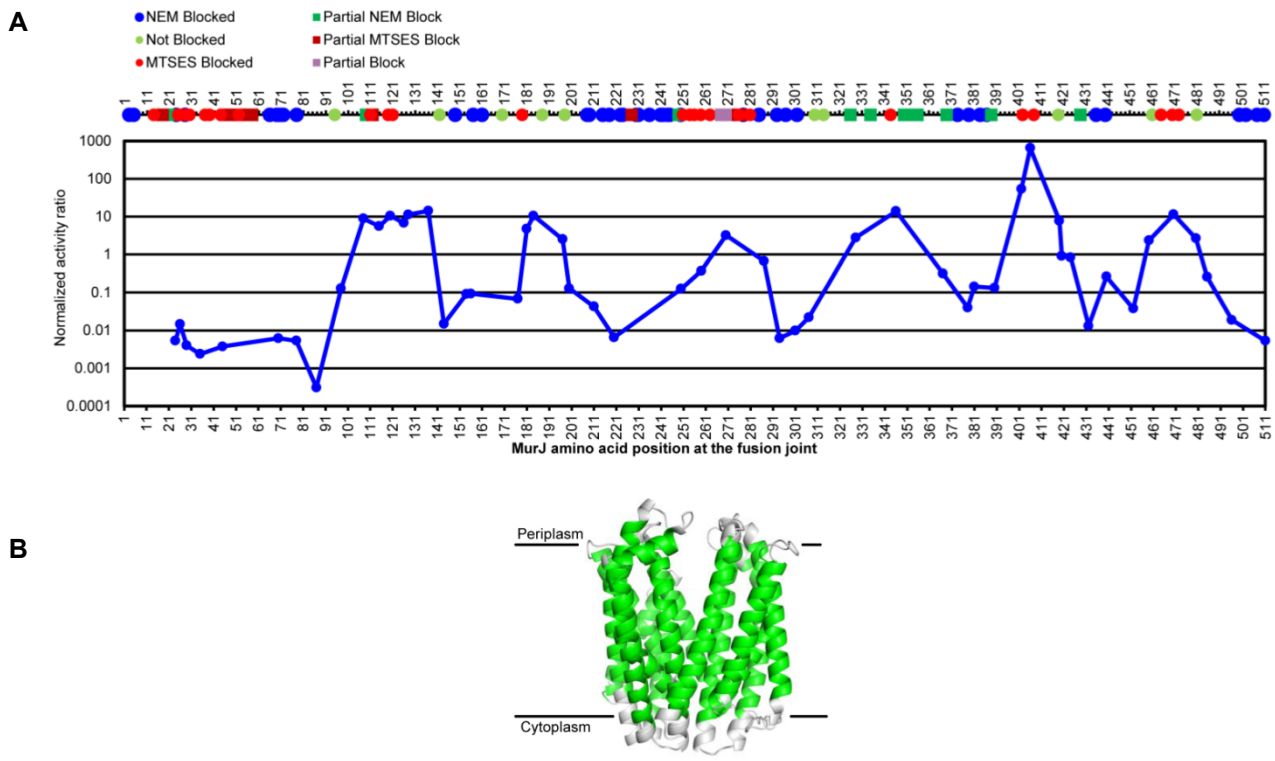

**FIGURE S5. A)** Comparison of SCAM and MurJ truncation-reporter fusion data. **(Top)** Linear representation of SCAM data. **(Bottom)** The normalized activity ratio is given per MurJ truncation-reporter fusion. This is a reproduction of Fig. 3B. **B)** TMDs presented in Fig. 5 are highlighted in green in the MurJ structure model generated by I-TASSER (6, 7).

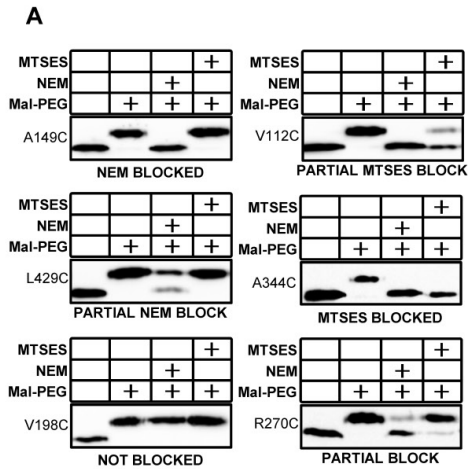

**B**

| Category            | NEM Block | MTSES Block | # Mutants |
|---------------------|-----------|-------------|-----------|
| NEM Blocked         | 100       | 0           | 42        |
| Partial NEM Block   | <100      | 0           | 15        |
| Not Blocked         | 0         | 0           | 10        |
| Partial MTSES Block | 100       | <100        | 16        |
| MTSES Blocked       | 100       | 100         | 25        |
| Partial Block       | >50       | >50         | 2         |
| Total:              |           |             | 110       |

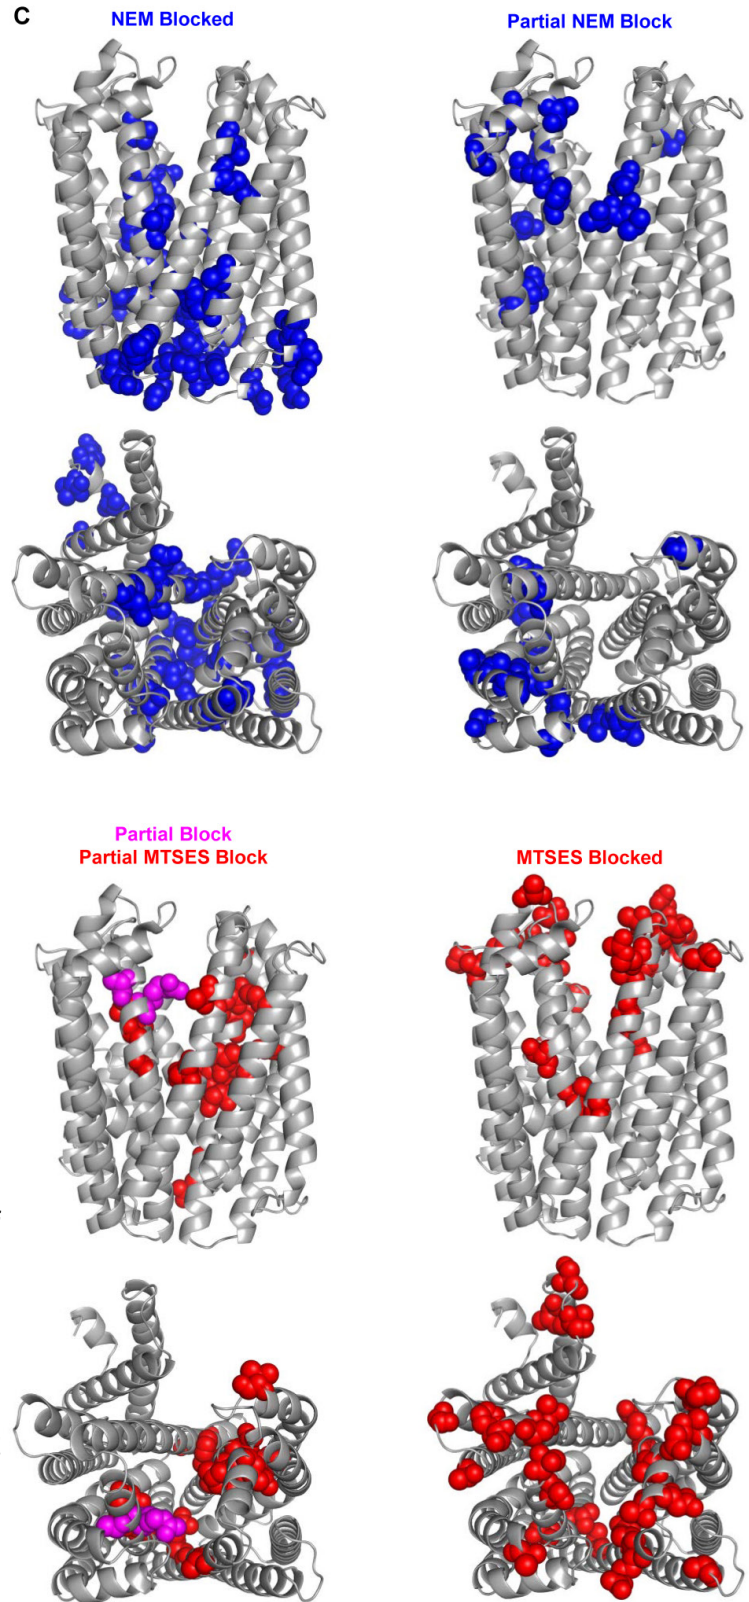

**FIGURE S6. A)** Representative  $\alpha$ FLAG immunoblot results from each SCAM result category. **B)** Table defining SCAM categories and summarizing results. **C)** Overlay of SCAM results on the structural model of MurJ. Category and colors are indicated in the text above each column. **C)** For each category, the front view (**top**) from the membrane plane and view from the periplasm (**bottom**) is given.



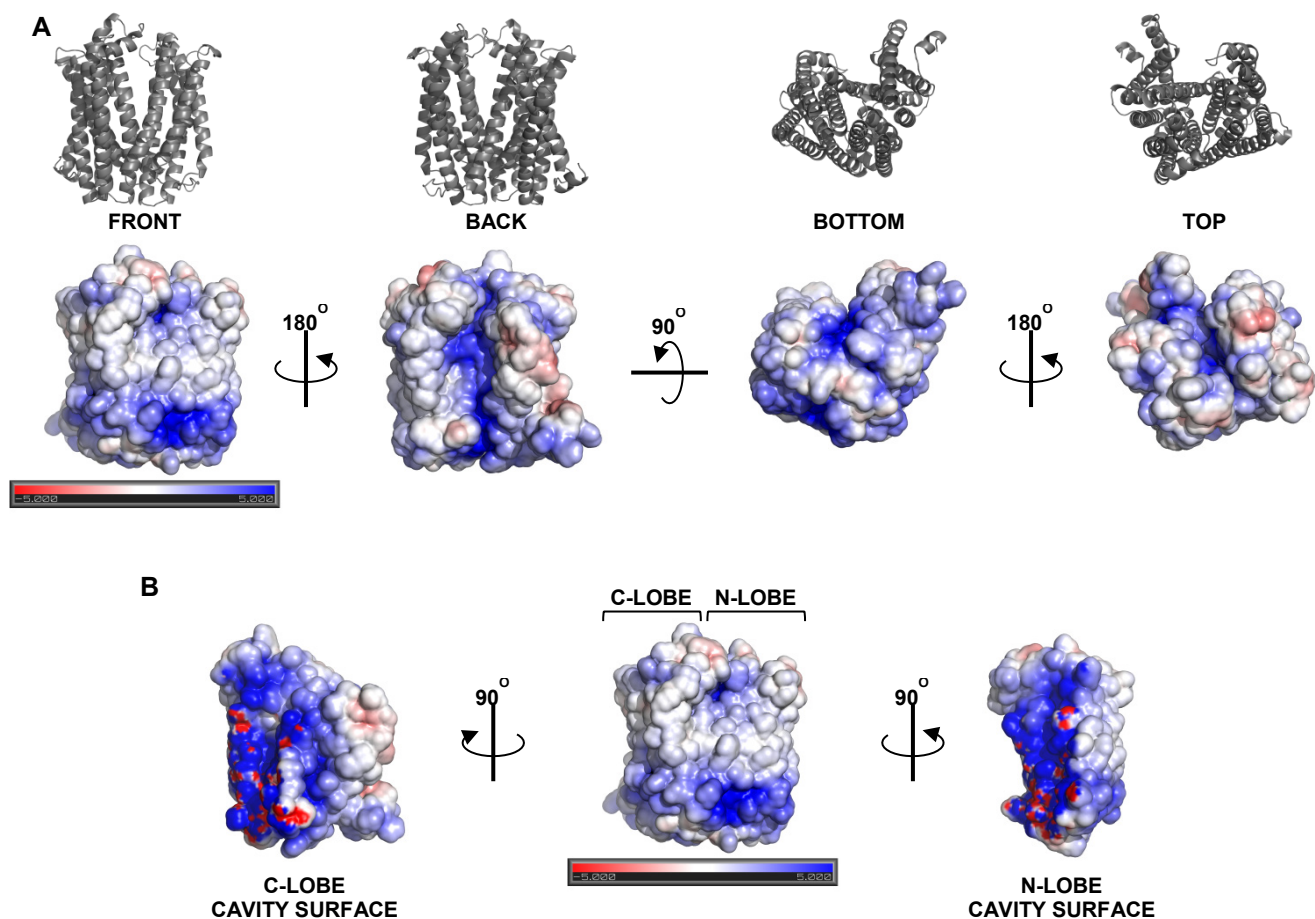

**FIGURE S7. Electrostatic potential of the MurJ model structure. A)** The MurJ structure is given as the cartoon representation at **top** for each solvent-accessible surface electrostatic representation at **bottom**. **B)** Electrostatic potential of the surface corresponding to each half of the MurJ cavity (N- and C-lobes). The N-terminal lobe shows the protein fragment that includes TMDs 1-6; the C-terminal lobe shows the protein fragment that includes TMDs 7-14. Lobes are shown with the surface of the cavity in front. Surfaces are colored according to charge from red (-5 kT/e) to blue (+5 kT/e). Solvent-accessible electrostatic potential was calculated using APBS (8) in PyMol Molecular Graphics System, Version 1.5.0.4 (Schrödinger, LLC, Portland, Oregon).

**TABLE S1. Strains used in this study**

| STRAIN   | RELEVANT GENOTYPE <sup>a</sup>                                                                | REFERENCE  |
|----------|-----------------------------------------------------------------------------------------------|------------|
| DH5α     | <i>fhuA2 lac(del)U169 phoA glnV44 Φ80' lacZ(del)M15 gyrA96 recA1 relA1 endA1 thi-1 hsdR17</i> |            |
| DY378    | λcl857 Δ( <i>cro-bioA</i> )                                                                   | (9)        |
| MC4100   | <i>araD139, Δ(lac)U169, strA, thi</i>                                                         | (10)       |
| NR754    | <i>araD</i> <sup>+</sup> revertant of MC4100                                                  | (11)       |
| NR1648   | NR754 <i>murJ::kan</i> (pRC7MurJ)                                                             | This study |
| NR2066   | NR754 <i>murJ::FRT</i> (pRC7MurJ)                                                             | This study |
| NR2117   | NR754 <i>murJ::FRT hsdR::kan</i> (pRC7MurJ)                                                   | This study |
| NR2040   | NR754 <i>murJ::kan</i> (pEcMurJwCterm)                                                        | This study |
| NR2075   | NR754 <i>murJ::kan</i> (pMurJ)                                                                | This study |
| NR2132   | NR754 <i>murJ::FRT hsdR::kan</i> (pFLAGMurJ)                                                  | This study |
| NR1628-1 | DH5α (pMurJTOP1533)                                                                           | This study |
| NR1693   | DH5α (pMurJTOP72)                                                                             | This study |
| NR1725-1 | DH5α (pMurJTOP78)                                                                             | This study |
| NR1995   | DH5α (pMurJTOP87)                                                                             | This study |
| NR1762   | DH5α (pMurJTOP105)                                                                            | This study |
| NR1971   | DH5α (pMurJTOP135)                                                                            | This study |
| NR1747   | DH5α (pMurJTOP210)                                                                            | This study |
| NR1797   | DH5α (pMurJTOP234)                                                                            | This study |
| NR1748   | DH5α (pMurJTOP261)                                                                            | This study |
| NR1798   | DH5α (pMurJTOP294)                                                                            | This study |
| NR1799   | DH5α (pMurJTOP324)                                                                            | This study |
| NR2008   | DH5α (pMurJTOP345)                                                                            | This study |
| NR1749   | DH5α (pMurJTOP360)                                                                            | This study |
| NR1727   | DH5α (pMurJTOP378)                                                                            | This study |
| NR1750   | DH5α (pMurJTOP384)                                                                            | This study |
| NR1988   | DH5α (pMurJTOP411)                                                                            | This study |
| NR1990   | DH5α (pMurJTOP432)                                                                            | This study |
| NR1801   | DH5α (pMurJTOP462)                                                                            | This study |
| NR1763   | DH5α (pMurJTOP468)                                                                            | This study |
| NR1802   | DH5α (pMurJTOP531)                                                                            | This study |
| NR2009   | DH5α (pMurJTOP543)                                                                            | This study |
| NR1803   | DH5α (pMurJTOP552)                                                                            | This study |
| NR1764   | DH5α (pMurJTOP591)                                                                            | This study |
| NR1996   | DH5α (pMurJTOP600)                                                                            | This study |
| NR2010   | DH5α (pMurJTOP633)                                                                            | This study |
| NR1765   | DH5α (pMurJTOP660)                                                                            | This study |
| NR1804   | DH5α (pMurJTOP750)                                                                            | This study |
| NR1989   | DH5α (pMurJTOP777)                                                                            | This study |
| NR1805   | DH5α (pMurJTOP810)                                                                            | This study |
| NR1806   | DH5α (pMurJTOP861)                                                                            | This study |
| NR1997   | DH5α (pMurJTOP882)                                                                            | This study |
| NR2016   | DH5α (pMurJTOP903)                                                                            | This study |
| NR1728   | DH5α (pMurJTOP921)                                                                            | This study |
| NR1807   | DH5α (pMurJTOP984)                                                                            | This study |
| NR1808   | DH5α (pMurJTOP1038)                                                                           | This study |
| NR1916   | DH5α (pMurJTOP1101)                                                                           | This study |
| NR1917   | DH5α (pMurJTOP1134)                                                                           | This study |
| NR1726-1 | DH5α (pMurJTOP1143)                                                                           | This study |
| NR1991   | DH5α (pMurJTOP1170)                                                                           | This study |
| NR2017   | DH5α (pMurJTOP1206)                                                                           | This study |
| NR1970   | DH5α (pMurJTOP1218)                                                                           | This study |
| NR1998   | DH5α (pMurJTOP1257)                                                                           | This study |
| NR1969   | DH5α (pMurJTOP1260)                                                                           | This study |

| STRAIN | RELEVANT GENOTYPE <sup>a</sup>                                 | REFERENCE  |
|--------|----------------------------------------------------------------|------------|
| NR2023 | DH5α (pMurJTOP1272)                                            | This study |
| NR2012 | DH5α (pMurJTOP1296)                                            | This study |
| NR2024 | DH5α (pMurJTOP1320)                                            | This study |
| NR2018 | DH5α (pMurJTOP1356)                                            | This study |
| NR2011 | DH5α (pMurJTOP1377)                                            | This study |
| NR2019 | DH5α (pMurJTOP1410)                                            | This study |
| NR2013 | DH5α (pMurJTOP1440)                                            | This study |
| NR2021 | DH5α (pMurJTOP1455)                                            | This study |
| NR2014 | DH5α (pMurJTOP1488)                                            | This study |
| NR2131 | NR754 <i>murJ::FRT hsdR::kan</i> (pFLAGMurJΔCys)               | This study |
| NR2569 | NR754 (pFLAGMurJΔCysΔR81-V511)                                 | This study |
| NR2202 | NR754 <i>murJ::FRT hsdR::kan</i> (pFLAGMurJΔCysL3C)            | This study |
| NR2296 | NR754 <i>murJ::FRT hsdR::kan</i> (pFLAGMurJΔCysK5C)            | This study |
| NR2184 | NR754 <i>murJ::FRT hsdR::kan</i> (pFLAGMurJΔCysT14C)           | This study |
| NR2323 | NR754 (pFLAGMurJΔCysR18C)                                      | This study |
| NR2679 | NR754 <i>murJ::FRT hsdR::kan</i> (pFLAGMurJΔCysR18A, pRC7MurJ) | This study |
| NR2203 | NR754 <i>murJ::FRT hsdR::kan</i> (pFLAGMurJΔCysV19C)           | This study |
| NR2501 | NR754 <i>murJ::FRT hsdR::kan</i> (pFLAGMurJΔCysL20C)           | This study |
| NR2204 | NR754 <i>murJ::FRT hsdR::kan</i> (pFLAGMurJΔCysA23C)           | This study |
| NR2356 | NR754 (pFLAGMurJΔCysR24C)                                      | This study |
| NR2680 | NR754 <i>murJ::FRT hsdR::kan</i> (pFLAGMurJΔCysR24A, pRC7MurJ) | This study |
| NR2297 | NR754 <i>murJ::FRT hsdR::kan</i> (pFLAGMurJΔCysD25C)           | This study |
| NR2185 | NR754 <i>murJ::FRT hsdR::kan</i> (pFLAGMurJΔCysA26C)           | This study |
| NR2502 | NR754 <i>murJ::FRT hsdR::kan</i> (pFLAGMurJΔCysV28C)           | This study |
| NR2186 | NR754 <i>murJ::FRT hsdR::kan</i> (pFLAGMurJΔCysA29C)           | This study |
| NR2298 | NR754 <i>murJ::FRT hsdR::kan</i> (pFLAGMurJΔCysR30C)           | This study |
| NR2214 | NR754 <i>murJ::FRT hsdR::kan</i> (pFLAGMurJΔCysA37C)           | This study |
| NR2254 | NR754 (pFLAGMurJΔCysD39C)                                      | This study |
| NR2681 | NR754 <i>murJ::FRT hsdR::kan</i> (pFLAGMurJΔCysD39A, pRC7MurJ) | This study |
| NR2279 | NR754 <i>murJ::FRT hsdR::kan</i> (pFLAGMurJΔCysA44C)           | This study |
| NR2299 | NR754 <i>murJ::FRT hsdR::kan</i> (pFLAGMurJΔCysK46C)           | This study |
| NR2683 | NR754 <i>murJ::FRT hsdR::kan</i> (pFLAGMurJΔCysK46A)           | This study |
| NR2503 | NR754 <i>murJ::FRT hsdR::kan</i> (pFLAGMurJΔCysL47C)           | This study |
| NR2205 | NR754 <i>murJ::FRT hsdR::kan</i> (pFLAGMurJΔCysN49C)           | This study |
| NR2324 | NR754 (pFLAGMurJΔCysR52C)                                      | This study |
| NR2687 | NR754 <i>murJ::FRT hsdR::kan</i> (pFLAGMurJΔCysR52A)           | This study |
| NR2300 | NR754 <i>murJ::FRT hsdR::kan</i> (pFLAGMurJΔCysR53C)           | This study |
| NR2504 | NR754 <i>murJ::FRT hsdR::kan</i> (pFLAGMurJΔCysI54C)           | This study |
| NR2505 | NR754 <i>murJ::FRT hsdR::kan</i> (pFLAGMurJΔCysF55C)           | This study |
| NR2206 | NR754 <i>murJ::FRT hsdR::kan</i> (pFLAGMurJΔCysA56C)           | This study |
| NR2207 | NR754 <i>murJ::FRT hsdR::kan</i> (pFLAGMurJΔCysE57C)           | This study |
| NR2416 | NR754 <i>murJ::FRT hsdR::kan</i> (pFLAGMurJΔCysG58C)           | This study |
| NR2495 | NR754 <i>murJ::FRT hsdR::kan</i> (pFLAGMurJΔCysP66C)           | This study |
| NR2215 | NR754 <i>murJ::FRT hsdR::kan</i> (pFLAGMurJΔCysA69C)           | This study |
| NR2208 | NR754 <i>murJ::FRT hsdR::kan</i> (pFLAGMurJΔCysE70C)           | This study |
| NR2209 | NR754 <i>murJ::FRT hsdR::kan</i> (pFLAGMurJΔCysY71C)           | This study |
| NR2210 | NR754 <i>murJ::FRT hsdR::kan</i> (pFLAGMurJΔCysK72C)           | This study |
| NR2462 | NR754 <i>murJ::FRT hsdR::kan</i> (pFLAGMurJΔCysD78C)           | This study |
| NR2248 | NR754 <i>murJ::FRT hsdR::kan</i> (pFLAGMurJΔCysL95C)           | This study |
| NR2143 | NR754 <i>murJ::FRT hsdR::kan</i> (pFLAGMurJΔCysV109C)          | This study |
| NR2187 | NR754 <i>murJ::FRT hsdR::kan</i> (pFLAGMurJΔCysM111C)          | This study |
| NR2188 | NR754 <i>murJ::FRT hsdR::kan</i> (pFLAGMurJΔCysV112C)          | This study |
| NR2442 | NR754 <i>murJ::FRT hsdR::kan</i> (pFLAGMurJΔCysD119C)          | This study |
| NR2427 | NR754 <i>murJ::FRT hsdR::kan</i> (pFLAGMurJΔCysA121C)          | This study |

| STRAIN | RELEVANT GENOTYPE <sup>a</sup>                                  | REFERENCE  |
|--------|-----------------------------------------------------------------|------------|
| NR2428 | NR754 <i>murJ::FRT hsdR::kan</i> (pFLAGMurJΔCysS142C)           | This study |
| NR2223 | NR754 <i>murJ::FRT hsdR::kan</i> (pFLAGMurJΔCysA149C)           | This study |
| NR2417 | NR754 <i>murJ::FRT hsdR::kan</i> (pFLAGMurJΔCysF157C)           | This study |
| NR2475 | NR754 <i>murJ::FRT hsdR::kan</i> (pFLAGMurJΔCysA161C)           | This study |
| NR2429 | NR754 <i>murJ::FRT hsdR::kan</i> (pFLAGMurJΔCysS170C)           | This study |
| NR2224 | NR754 <i>murJ::FRT hsdR::kan</i> (pFLAGMurJΔCysA179C)           | This study |
| NR2430 | NR754 <i>murJ::FRT hsdR::kan</i> (pFLAGMurJΔCysA188C)           | This study |
| NR2431 | NR754 <i>murJ::FRT hsdR::kan</i> (pFLAGMurJΔCysV198C)           | This study |
| NR2418 | NR754 <i>murJ::FRT hsdR::kan</i> (pFLAGMurJΔCysL208C)           | This study |
| NR2443 | NR754 <i>murJ::FRT hsdR::kan</i> (pFLAGMurJΔCysK209C)           | This study |
| NR2225 | NR754 <i>murJ::FRT hsdR::kan</i> (pFLAGMurJΔCysV215C)           | This study |
| NR2444 | NR754 <i>murJ::FRT hsdR::kan</i> (pFLAGMurJΔCysR218C)           | This study |
| NR2445 | NR754 <i>murJ::FRT hsdR::kan</i> (pFLAGMurJΔCysD223C)           | This study |
| NR2280 | NR754 <i>murJ::FRT hsdR::kan</i> (pFLAGMurJΔCysA224C)           | This study |
| NR2463 | NR754 <i>murJ::FRT hsdR::kan</i> (pFLAGMurJΔCysR228C)           | This study |
| NR2281 | NR754 <i>murJ::FRT hsdR::kan</i> (pFLAGMurJΔCysV230C)           | This study |
| NR2464 | NR754 <i>murJ::FRT hsdR::kan</i> (pFLAGMurJΔCysK231C)           | This study |
| NR2476 | NR754 <i>murJ::FRT hsdR::kan</i> (pFLAGMurJΔCysA236C)           | This study |
| NR2282 | NR754 <i>murJ::FRT hsdR::kan</i> (pFLAGMurJΔCysS241C)           | This study |
| NR2531 | NR754 <i>murJ::FRT hsdR::kan</i> (pFLAGMurJΔCysV242C)           | This study |
| NR2432 | NR754 <i>murJ::FRT hsdR::kan</i> (pFLAGMurJΔCysQ244C)           | This study |
| NR2506 | NR754 <i>murJ::FRT hsdR::kan</i> (pFLAGMurJΔCysI245C)           | This study |
| NR2477 | NR754 <i>murJ::FRT hsdR::kan</i> (pFLAGMurJΔCysI249C)           | This study |
| NR2478 | NR754 <i>murJ::FRT hsdR::kan</i> (pFLAGMurJΔCysN250C)           | This study |
| NR2283 | NR754 <i>murJ::FRT hsdR::kan</i> (pFLAGMurJΔCysT251C)           | This study |
| NR2479 | NR754 <i>murJ::FRT hsdR::kan</i> (pFLAGMurJΔCysA254C)           | This study |
| NR2480 | NR754 <i>murJ::FRT hsdR::kan</i> (pFLAGMurJΔCysF256C)           | This study |
| NR2144 | NR754 <i>murJ::FRT hsdR::kan</i> (pFLAGMurJΔCysS259C)           | This study |
| NR2419 | NR754 <i>murJ::FRT hsdR::kan</i> (pFLAGMurJΔCysS263C)           | This study |
| NR2481 | NR754 <i>murJ::FRT hsdR::kan</i> (pFLAGMurJΔCysA268C)           | This study |
| NR2465 | NR754 <i>murJ::FRT hsdR::kan</i> (pFLAGMurJΔCysD269C)           | This study |
| NR2684 | NR754 <i>murJ::FRT hsdR::kan</i> (pFLAGMurJΔCysD269A)           | This study |
| NR2483 | NR754 (pFLAGMurJΔCysR270C)                                      | This study |
| NR2685 | NR754 <i>murJ::FRT hsdR::kan</i> (pFLAGMurJΔCysR270A, pRC7MurJ) | This study |
| NR2284 | NR754 <i>murJ::FRT hsdR::kan</i> (pFLAGMurJΔCysM272C)           | This study |
| NR2359 | NR754 <i>murJ::FRT hsdR::kan</i> (pFLAGMurJΔCysE273C)           | This study |
| NR2686 | NR754 <i>murJ::FRT hsdR::kan</i> (pFLAGMurJΔCysE273A)           | This study |
| NR2484 | NR754 <i>murJ::FRT hsdR::kan</i> (pFLAGMurJΔCysP275C)           | This study |
| NR2358 | NR754 <i>murJ::FRT hsdR::kan</i> (pFLAGMurJΔCysS276C)           | This study |
| NR2485 | NR754 <i>murJ::FRT hsdR::kan</i> (pFLAGMurJΔCysG277C)           | This study |
| NR2249 | NR754 <i>murJ::FRT hsdR::kan</i> (pFLAGMurJΔCysV278C)           | This study |
| NR2285 | NR754 <i>murJ::FRT hsdR::kan</i> (pFLAGMurJΔCysV281C)           | This study |
| NR2286 | NR754 <i>murJ::FRT hsdR::kan</i> (pFLAGMurJΔCysT285C)           | This study |
| NR2319 | NR754 <i>murJ::FRT hsdR::kan</i> (pFLAGMurJΔCysK293C)           | This study |
| NR2134 | NR754 <i>murJ::FRT hsdR::kan</i> (pFLAGMurJΔCysS297C)           | This study |
| NR2466 | NR754 <i>murJ::FRT hsdR::kan</i> (pFLAGMurJΔCysE302C)           | This study |
| NR2318 | NR754 <i>murJ::FRT hsdR::kan</i> (pFLAGMurJΔCysG310C)           | This study |
| NR2145 | NR754 <i>murJ::FRT hsdR::kan</i> (pFLAGMurJC419S)               | This study |
| NR2253 | NR754 <i>murJ::FRT hsdR::kan</i> (pFLAGMurJΔCysG326C)           | This study |
| NR2252 | NR754 <i>murJ::FRT hsdR::kan</i> (pFLAGMurJΔCysS335C)           | This study |
| NR2226 | NR754 <i>murJ::FRT hsdR::kan</i> (pFLAGMurJΔCysA344C)           | This study |
| NR2507 | NR754 <i>murJ::FRT hsdR::kan</i> (pFLAGMurJΔCysT350C)           | This study |
| NR2360 | NR754 <i>murJ::FRT hsdR::kan</i> (pFLAGMurJΔCysA353C)           | This study |
| NR2508 | NR754 <i>murJ::FRT hsdR::kan</i> (pFLAGMurJΔCysA356C)           | This study |
| NR2433 | NR754 <i>murJ::FRT hsdR::kan</i> (pFLAGMurJΔCysV369C)           | This study |

| STRAIN | RELEVANT GENOTYPE <sup>a</sup>                        | REFERENCE  |
|--------|-------------------------------------------------------|------------|
| NR2227 | NR754 <i>murJ::FRT hsdR::kan</i> (pFLAGMurJΔCysF374C) | This study |
| NR2250 | NR754 <i>murJ::FRT hsdR::kan</i> (pFLAGMurJΔCysD379C) | This study |
| NR2251 | NR754 <i>murJ::FRT hsdR::kan</i> (pFLAGMurJΔCysV384C) | This study |
| NR2509 | NR754 <i>murJ::FRT hsdR::kan</i> (pFLAGMurJΔCysA387C) | This study |
| NR2459 | NR754 <i>murJ::FRT hsdR::kan</i> (pFLAGMurJΔCysV389C) | This study |
| NR2228 | NR754 <i>murJ::FRT hsdR::kan</i> (pFLAGMurJΔCysG403C) | This study |
| NR2535 | NR754 <i>murJ::FRT hsdR::kan</i> (pFLAGMurJΔCysA408C) | This study |
| NR2133 | NR754 <i>murJ::FRT hsdR::kan</i> (pFLAGMurJC314S)     | This study |
| NR2301 | NR754 <i>murJ::FRT hsdR::kan</i> (pFLAGMurJΔCysL429C) | This study |
| NR2302 | NR754 <i>murJ::FRT hsdR::kan</i> (pFLAGMurJΔCysT436C) | This study |
| NR2454 | NR754 <i>murJ::FRT hsdR::kan</i> (pFLAGMurJΔCysG440C) | This study |
| NR2455 | NR754 <i>murJ::FRT hsdR::kan</i> (pFLAGMurJΔCysG461C) | This study |
| NR2361 | NR754 <i>murJ::FRT hsdR::kan</i> (pFLAGMurJΔCysI465C) | This study |
| NR2211 | NR754 <i>murJ::FRT hsdR::kan</i> (pFLAGMurJΔCysS470C) | This study |
| NR2456 | NR754 <i>murJ::FRT hsdR::kan</i> (pFLAGMurJΔCysT473C) | This study |
| NR2320 | NR754 <i>murJ::FRT hsdR::kan</i> (pFLAGMurJΔCysL481C) | This study |
| NR2457 | NR754 <i>murJ::FRT hsdR::kan</i> (pFLAGMurJΔCysG500C) | This study |
| NR2362 | NR754 <i>murJ::FRT hsdR::kan</i> (pFLAGMurJΔCysV503C) | This study |
| NR2363 | NR754 <i>murJ::FRT hsdR::kan</i> (pFLAGMurJΔCysR508C) | This study |
| NR2229 | NR754 <i>murJ::FRT hsdR::kan</i> (pFLAGMurJΔCysV511C) | This study |

<sup>a</sup> For pMurJTOP plasmids, the number indicates the bp within the *murJ* coding sequence at which *murJ* was truncated.

**TABLE S2. Primers used in this study**

| PRIMER NAME        | SEQUENCE 5'-3'                                                                                | PURPOSE                          |
|--------------------|-----------------------------------------------------------------------------------------------|----------------------------------|
| 5EcoR1PgfA         | cggaattctggattagaacaccgatgaat                                                                 | pRC7 <i>murJ</i> construction    |
| 3Hind3PgfA         | ccaagcttggaaatgcattgttacaccgt                                                                 | pRC7 <i>murJ</i> construction    |
| pEcMurJwCterm      | gtaagggctgcacctgcagccaagctaa                                                                  | pFLAGMurJ construction           |
| 3pEcMurJwCterm     | accgtccggcgggcaaatctttaac                                                                     | pFLAGMurJ construction           |
| 5MurJNtHisDEL      | tattaaaatcgctggccgccgtcag                                                                     | pFLAGMurJ construction           |
| 3pEcMurJntHisDel   | aattcatagttaattctcctcttaag                                                                    | pFLAGMurJ construction           |
| 5NtermFlgMmurJ     | gattataaagatgacgatgacaaaaattataaaatcgctggccgccgt                                              | pFLAGMurJ construction           |
| 3NtermFlgMmurJ     | catagttaattctcctcttaag                                                                        | pFLAGMurJ construction           |
| 3pFlgMurJdel81-511 | gtggcgtctcaccctgcttact                                                                        | pFLAGMurJ truncation             |
| 5murJP1            | ggtagactattgcctcttcagcgcctgccttcaggcg<br>tttgcccgtgggtctgattagaacaccgatgggtaggctggagctgcttc   | Chromosomal <i>murJ</i> deletion |
| 3murJP2            | cgg cgg taaaaagat ttc gat ctg aag attatcctggcctgcac<br>tgcaggccggaatgcattgtacatatgaatcctcctta | Chromosomal <i>murJ</i> deletion |
| 5MurJ10UPXba       | gctctagaacaccgatgaattt                                                                        | MurJ truncation-reporter fusions |
| 3MurJ11DOWNBamHI   | atgcattgttaggatcccaccgtccg                                                                    | MurJ truncation-reporter fusions |
| 5phoAEcoRV         | tcgatatcgttctggaaaaccg                                                                        | MurJ truncation-reporter fusions |
| 3MurJEcoRV72       | tcgatatctcgtgcgaagccaagcac                                                                    | MurJ truncation-reporter fusions |
| 3MurJEcoRV78       | tcgatatctcgtctcgtgcgaagcca                                                                    | MurJ truncation-reporter fusions |
| 3MurJEcoRV87       | tcgatatcggcgacaattgcgtctcgtgc                                                                 | MurJ truncation-reporter fusions |
| 3MurJEcoRV105      | tcgatatcccctgcgccaagattctg                                                                    | MurJ truncation-reporter fusions |
| 3MurJEcoRV135      | tcgatatcaaaagcgacgaaaaagggcg                                                                  | MurJ truncation-reporter fusions |
| 3MurJEcoRV210      | tcgatatctccgccagaatcggtaacaatg                                                                | MurJ truncation-reporter fusions |
| 3MurJEcoRV234      | tcgatatcgtctcaccctgcttactttta                                                                 | MurJ truncation-reporter fusions |
| MurJEcoRV261       | tcgatatcaacataagagacaaaagaccgcg                                                               | MurJ truncation-reporter fusions |
| 3MurJEcoRV294      | tcgatatccacaaccgccagcgcaagtg                                                                  | MurJ truncation-reporter fusions |
| 3MurJEcoRV324      | tcgatatcccacgggtgcggcgagcatg                                                                  | MurJ truncation-reporter fusions |
| 3MurJEcoRV345      | tcgatatctggcgggtcaccatgatcac                                                                  | MurJ truncation-reporter fusions |
| 3MurJEcoRV360      | tcgatatctgtgtcagcgaagcctggc                                                                   | MurJ truncation-reporter fusions |
| 3MurJEcoRV378      | tcgatatccagggcaaatgttcagc                                                                     | MurJ truncation-reporter fusions |
| 3MurJEcoRV384      | tcgatatcgtgttcagggcaaatgttc                                                                   | MurJ truncation-reporter fusions |
| 3MurJEcoRV411      | tcgatatcatagggaaaggtaatctttag                                                                 | MurJ truncation-reporter fusions |
| 3MurJEcoRV432      | tcg ata tcc gcc agg gag atc agc aag                                                           | MurJ truncation-reporter fusions |
| 3MurJEcoRV462      | ttgatatcccacgtattcagaatcgtctccc                                                               | MurJ truncation-reporter fusions |
| 3MurJEcoRV468      | tcgatatcgcgggtccacgtattcagaatc                                                                | MurJ truncation-reporter fusions |
| 3MurJEcoRV531      | tcgatatcaaacagcgcgaaaccaatcatgc                                                               | MurJ truncation-reporter fusions |
| 3MurJEcoRV543      | tcgatatcgtacgggtcggcaaacagcg                                                                  | MurJ truncation-reporter fusions |
| 3MurJEcoRV552      | tcgatatctgggttaagtagcgggtgcg                                                                  | MurJ truncation-reporter fusions |
| 3MurJEcoRV591      | tcgatatcggcggaccgtaaacgc                                                                      | MurJ truncation-reporter fusions |
| 3MurJEcoRV600      | tcgatatcctgcaggacgcccgcg                                                                      | MurJ truncation-reporter fusions |
| 3MurJEcoRV633      | tcgatatcgtatctcttcagggtcggtag                                                                 | MurJ truncation-reporter fusions |
| 3MurJEcoRV660      | tcgatatcgttaatgcggcgaggac                                                                     | MurJ truncation-reporter fusions |
| 3MurJEcoRV750      | tcgatatcgttgatgattaaggagatctggc                                                               | MurJ truncation-reporter fusions |
| 3MurJEcoRV777      | tcgatatcggaaagcaagaaacagaggc                                                                  | MurJ truncation-reporter fusions |
| 3MurJEcoRV810      | tcgatatcggcgtcggcgaataacat                                                                    | MurJ truncation-reporter fusions |
| 3MurJEcoRV861      | tcgatatcaaaatggtccaagcggccac                                                                  | MurJ truncation-reporter fusions |
| 3MurJEcoRV882      | tcgatatcatctttcgacagcgacggcagc                                                                | MurJ truncation-reporter fusions |
| 3MurJEcoRV903      | tcgatatcatcatgattgccactggcaa                                                                  | MurJ truncation-reporter fusions |
| 3MurJEcoRV921      | tcgatatccatcaaacgggttattcatcatg                                                               | MurJ truncation-reporter fusions |
| 3MurJEcoRV984      | tcgatatcaagaatgcccaacgcaaccg                                                                  | MurJ truncation-reporter fusions |
| 3MurJEcoRV1038     | tcgatatcatcaaacgggtaaatctaccg                                                                 | MurJ truncation-reporter fusions |
| 3MurJEcoRV1101     | tcgatatccactacaatcaggccaatcaaac                                                               | MurJ truncation-reporter fusions |

| PRIMER NAME    | SEQUENCE 5'-3'                                      | PURPOSE                          |
|----------------|-----------------------------------------------------|----------------------------------|
| 3MurJEcorV1134 | tcgatatcctggcggaataaaagcc                           | MurJ truncation-reporter fusions |
| 3MurJEcorV1143 | tcgatatctttaatgtcctggcggg                           | MurJ truncation-reporter fusions |
| 3MurJEcorV1170 | tcgatatccgtaacgatggcaattttcac                       | MurJ truncation-reporter fusions |
| 3MurJ1206EcoRV | tc gatatc aataaacgccaggttcac                        | MurJ truncation-reporter fusions |
| 3MurJEcorV1218 | tcgatatctttcaacggaccaataaacgc                       | MurJ truncation-reporter fusions |
| 3MurJ1257EcoRV | tcgatatcacacgccgagaccaatag                          | MurJ truncation-reporter fusions |
| 3MurJEcorV1260 | tcgatatccagacacgccgagacc                            | MurJ truncation-reporter fusions |
| 3MurJ1272EcoRV | tcgatatccagcgaagcattcagacagc                        | MurJ truncation-reporter fusions |
| 3MurJ1296EcoRV | tcgatatcctgcttacgcaactgccag                         | MurJ truncation-reporter fusions |
| 3MurJEcoRV1320 | tcgatatcgccgggttgcgggtaaagat                        | MurJ truncation-reporter fusions |
| 3MurJ1356EcoRV | tcgatatctaccgccaccaccagacgc                         | MurJ truncation-reporter fusions |
| 3MurJEcoRV1377 | tcgatatcaagcagccagacatcaccag                        | MurJ truncation-reporter fusions |
| 3MurJEcoRV1410 | tcgatatctgaccactccggcatgatag                        | MurJ truncation-reporter fusions |
| 3MurJ1440EcoRV | tcgatatcacgcagtaaacgccagggca                        | MurJ truncation-reporter fusions |
| 3MurJEcoRV1455 | tcgatatccagaccgccattaaacgcag                        | MurJ truncation-reporter fusions |
| 3MurJ1488EcoRV | tcgatatccagtgacggaagtacgcgg                         | MurJ truncation-reporter fusions |
| 5pEcMurJC314S  | ggggttgcgtcttagcttctgttggcg                         | SCAM                             |
| 3pEcMurJC314S  | cgccaacaggaagctaagacgcaccccc                        | SCAM                             |
| 5pEcMurJC419S2 | tggctggcggcgagctgaatgctcg                           | SCAM                             |
| 3pEcMurJC419S2 | cgaagcattcagactcgccgagacca                          | SCAM                             |
| 5pFlgMurJL3C   | ggattataaagatgacgatgacaaaaattgcttaaaatcgctggccgcc   | SCAM                             |
| 3pFlgMurJL3C   | ggcggccagcgattttaaagcaattttgtcatcgtcatcttataatcc    | SCAM                             |
| 5pFlgMurJK5C   | gattataaagatgacgatgacaaaaattattatgctcgtggccgacctgag | SCAM                             |
| 3pFlgMurJK5C   | ctgacggcggccagcgagcataataaattttgtcatcgtcatcttataatc | SCAM                             |
| 5MurJT14C      | cgccgtcagctcgatgtgcatgttttcgctgtg                   | SCAM                             |
| 3MurJT14C      | cacacgcgaaaaatgcacatcgagctgacggcg                   | SCAM                             |
| 5MurJR18C      | gatgaccatgtttcgtgtgtgcttggcttcgc                    | SCAM                             |
| 3MurJR18C      | gcgaagccaagcacacacgaaaaatggtcatc                    | SCAM                             |
| 5MurJR18A      | cgatgaccatgttttcggtgtgcttggcttcgcac                 | Mutagenesis                      |
| 3MurJR18A      | gtcggaagccaagcacagccgaaaaatggtcatcg                 | Mutagenesis                      |
| 5MurJV19C      | gatgaccatgttttcggttgccttggcttcgacgagacg             | SCAM                             |
| 3MurJV19C      | cgctcgtgcgaagccaaggcaacgcgaaaaatggtcatc             | SCAM                             |
| 5MurJL20C      | ccatgttttcgctgtgtgtgcttcgacgagacg                   | SCAM                             |
| 3MurJL20C      | cgctcgtgcgaagccaacacacacgcgaaaaatggt                | SCAM                             |
| 5MurJA23C      | cgctgtgcttggcttctgcccagagcgaattgtcgc                | SCAM                             |
| 3MurJA23C      | gcgacaattgctctcggcagaagccaagcacacgcg                | SCAM                             |
| 5MurJR24C      | gtgcttggcttcgcatgacgcaattgtcgc                      | SCAM                             |
| 3MurJR24C      | ggcgacaattgctcgcagcgaagccaagcac                     | SCAM                             |
| 5MurJR24A      | cgctgtgcttggcttcgagcagacgcaattg                     | Mutagenesis                      |
| 3MurJR24A      | caattgctcgtcgcgaagccaagcacacgcg                     | Mutagenesis                      |
| 5MurJD25C      | tgtgcttggcttcgacgatgcgaattgtcgc                     | SCAM                             |
| 3MurJD25C      | ggcgacaattgctcgcagcgaagccaagcacaca                  | SCAM                             |
| 5MurJA26C      | gcttggcttcgacgagactgcattgtccagaatcttg               | SCAM                             |
| 3MurJA26C      | caaagattcggcgacaatgcagtctcgtgcaagccaagc             | SCAM                             |
| 5MurJV28C      | tggcttcgacgagacgcaattgcccagaatcttg                  | SCAM                             |
| 3MurJV28C      | caaagattcggcgcaattgctcgtcgcgaagcca                  | SCAM                             |
| 5MurJA29C      | cacgagacgcaattgtctgcagaatcttggcgcag                 | SCAM                             |
| 3MurJA29C      | ctgcgcaaaagattctgcagacaattgctcctg                   | SCAM                             |
| 5MurJR30C      | gacgcaattgtcctgcatcttggcgcagg                       | SCAM                             |
| 3MurJR30C      | ccctgcgcaaaagatgcaggcgaacaattgcgtc                  | SCAM                             |
| 5MurJA37C      | atcttggcgcaggatgtgcaccgacgccttttctc                 | SCAM                             |
| 3MurJA37C      | gacgaaaaaggcgtggtgcacatccctgcgcaaat                 | SCAM                             |

| PRIMER NAME | SEQUENCE 5'-3'                                 | PURPOSE     |
|-------------|------------------------------------------------|-------------|
| 5MurJD39C   | gcaggatgagcaacctgagccttttcgtcgc                | SCAM        |
| 3MurJD39C   | gcgacgaaaaaggcgcaggtgccatccctgc                | SCAM        |
| 5MurJD39A2  | agggatggcaaccgagccttttcgtcgc                   | Mutagenesis |
| 3MurJD39A2  | cgacgaaaaaggcgcggtgccatccct                    | Mutagenesis |
| 5MurJA44C   | gcaaccgacgccttttcgtcgttttaacctcctaactgtt       | SCAM        |
| 3MurJA44C   | aacaagttaggaagttaaaacagacgaaaaaggcgcggtgc      | SCAM        |
| 5MurJK46C   | cgacgccttttcgtcgccttttcgtcctcctaactgttacgcg    | SCAM        |
| 3MurJK46C   | cggcgtacaagttaggaaggcaaaaagcgcgaaaaaggcgcgc    | SCAM        |
| 5MurJK46A   | cgacgccttttcgtcgccttttcgactcctaactgttacg       | Mutagenesis |
| 3MurJK46A   | cgtaacaagttaggaagtgcaaaagcgcgaaaaaggcgcgc      | Mutagenesis |
| 5MurJL47C   | accgacgccttttcgtcgccttttaaatgctcctaactgttacg   | SCAM        |
| 3MurJL47C   | cgtaacaagttaggaacttaaaagcgcgaaaaaggcgcgcgt     | SCAM        |
| 5MurJN49C   | ttcgtcgccttttaactcctgctgttacgcgctatccttgc      | SCAM        |
| 3MurJN49C   | gcaaaagatacggcgtacaagcaaggaagttaaaagcgcgcaa    | SCAM        |
| 5MurJR52C   | gtcgccttttaactcctaactgttacgcgctatccttgc        | SCAM        |
| 3MurJR52C   | ggcaaaagatacggcgtacaagttaggaagttaaaagcgcgc     | SCAM        |
| 5MurJR52A   | cggcaaaagatacggcgtacaagttaggaagttaaaagcgcga    | Mutagenesis |
| 3MurJR52A   | tcgcttttaactcctaactgttacgcgctatccttgcgc        | Mutagenesis |
| 5MurJR53C   | ttcctaactgttacgcgctatccttgcggaaggg             | SCAM        |
| 3MurJR53C   | cccttcggcaaaagatacagcgtacaagttagga             | SCAM        |
| 5MurJI54C   | cctaactgttacgcgctgttgcggaagggcatt              | SCAM        |
| 3MurJI54C   | aatgcccttcggcaaaagcaacggcgtacaagttaggt         | SCAM        |
| 5MurJS55C   | ctaactgttacgcgctatcgtgcggaagggg                | SCAM        |
| 3MurJS55C   | ccccttcggcacagatacggcgtacaagttag               | SCAM        |
| 5MurJA56C   | tcctaactgttacgcgctatccttgcggaagggcatt          | SCAM        |
| 3MurJA56C   | aaatgcccttcgcaaaagatacggcgtacaagttagga         | SCAM        |
| 5MurJE57C   | gttacgcgctatccttgcgctgttcctcagcagcatt          | SCAM        |
| 3MurJE57C   | atgcctgggaaaaatgcccgaggcaaaagatacggcgtaac      | SCAM        |
| 5MurJG58C   | acgcccgtatccttgcggaatgcgctatcctcagc            | SCAM        |
| 3MurJG58C   | cctgggaaaaatgcgctatcggcaaaagatacggcgt          | SCAM        |
| 5MurJP66C   | gggcatttccagcagcattgtatgcattcggcgaatataaaagt   | SCAM        |
| 3MurJP66C   | actttatattccggcagaatgcatacaaatgctgggaaaaatgcc  | SCAM        |
| 5MurJA69C   | ccagcattgtaccgattctgtgcgaatataaaagtaagcaggggtg | SCAM        |
| 3MurJA69C   | caccctgctactttatattgcacagaatcggtaacaatgcctgg   | SCAM        |
| 5MurJE70C   | ggcattgtaccgattctggcgtctataaaagtaagcaggggtgaag | SCAM        |
| 3MurJE70C   | ctcaccctgctactttatagcagccagaatcggtaacaatgcc    | SCAM        |
| 5MurJY71C   | accgattctggcgaatgtaaaagtaagcaggggtg            | SCAM        |
| 3MurJY71C   | caccctgctactttacattccgccaagaatcgggt            | SCAM        |
| 5MurJK72C   | ttgtaccgattctggcgaatattgcagtaagcaggggtgaagacg  | SCAM        |
| 3MurJK72C   | cgcttcaccctgctactgcaatattccgccaagaatcggtaaca   | SCAM        |
| 5MurJS85C   | acgcccgtcttctgtctgtatgttctggcctg               | SCAM        |
| 3MurJS85C   | caggccagaacataacagacaagaccgctg                 | SCAM        |
| 5MurJL95C   | cctgctgacactgctgctgcgctgtgtgacgggtc            | SCAM        |
| 3MurJL95C   | cgaccgtcacaaccgacgcagcaaggtgacgagc             | SCAM        |
| 5MurJV109C  | ccgaccgtggtgcatcatggtgacc                      | SCAM        |
| 3MurJV109C  | ggtcaccatgatgcaccacgggtgcg                     | SCAM        |
| 5MurJM111C  | gcaccgtgggtgatctgctgaccgagccagggc              | SCAM        |
| 3MurJM111C  | gcctggcgggtgacgcagatcaccacgggtg                | SCAM        |
| 5MurJV112C  | caccgtgggtgatcatgtgaccgagccagggctc             | SCAM        |
| 3MurJV112C  | gaagcctggcgggtgacatgatcaccacgggtg              | SCAM        |
| 5MurJD119C  | ccgcccagggctgctgacagctgacaatttgc               | SCAM        |
| 3MurJD119C  | gcaaatgtgacgctgcaagcgaagcctggcgcg              | SCAM        |



| PRIMER NAME | SEQUENCE 5'-3'                                | PURPOSE |
|-------------|-----------------------------------------------|---------|
| 5MurJA121C  | gcgccaggcttcgctgacacatgtgacaaatttc            | SCAM    |
| 3MurJA121C  | gcaaatttgtcacatgtgtcagcgaagcctggcgc           | SCAM    |
| 5MurJS142C  | ccctatatctgtgatctgctggcgtcg                   | SCAM    |
| 3MurJS142C  | cgagccaggcagatcagcaagatatagg                  | SCAM    |
| 5MurJA149C  | ctggcgtcgtggggatgattctgaatacgtggaac           | SCAM    |
| 3MurJA149C  | gttccacgtattcagaatgcatcccaccagcgaccag         | SCAM    |
| 5MurJN152C  | ggttggagcgattctgtgtacgtggaaccgcttc            | SCAM    |
| 3MurJN152C  | gaagcggttccacgtacacagaatcgctcccacc            | SCAM    |
| 5MurJA161C  | gaaccgcttctgattccgtcttctccaacactgctta         | SCAM    |
| 3MurJA161C  | taagcagtggtggagcaaagcacggaatcgagaagcggttc     | SCAM    |
| 5MurJS170C  | caacactgcttaacatctgcatgattggttcgcg            | SCAM    |
| 3MurJS170C  | cgcgaaaccaatcagatgtaagcagtggtg                | SCAM    |
| 5MurJA179C  | ggtttcgctgtttgcctgcccgtactttaaccaccg          | SCAM    |
| 3MurJ179C   | cggtgggttaaagtcagggcagcgaacagcgcgaaacc        | SCAM    |
| 5MurJA188C  | cccaccggtgctgtgctggcgtgggctg                  | SCAM    |
| 3MurJA188C  | cagcccacgccaggcacagcaccggtggg                 | SCAM    |
| 5MurJV198C  | tacggtcggcggctgctgcagctggtg                   | SCAM    |
| 3MurJV198C  | caccagctgcaggcagcgcgaccgta                    | SCAM    |
| 5MurJL208C  | gggtatcagctaccgactcaagaagatcgcatgctgg         | SCAM    |
| 3MurJL208C  | ccagcatgccgatcttctgacgtgctgtagctgataacc       | SCAM    |
| 5MurJK209C  | tatcagctaccgacactgtgcaagatcggatgctggtc        | SCAM    |
| 3MurJK209C  | gaccagcatccgatcttgcaagtgctgtagctgata          | SCAM    |
| 5MurJV215C  | gaagatcggcatgctgtgctgctgcccgcattaac           | SCAM    |
| 3MurJV215C  | gttaatgcccggcaggcacagcatgccgatcttc            | SCAM    |
| 5MurJR218C  | atgctggtcctgcccgtgcattaactccacg               | SCAM    |
| 3MurJR218C  | cgtggaagttaatgcacggcaggaccagcat               | SCAM    |
| 5MurJA224C  | ccgcccattaactccagattgaggagcaatgc              | SCAM    |
| 3MurJA224C  | gcattgctccgcaatcgtggaagttaatgcccgg            | SCAM    |
| 5MurJR228C  | gatgccggagcaatgtgctggtgaaacaga                | SCAM    |
| 3MurJR228C  | tctgttccaccgcacattgctccggcatc                 | SCAM    |
| 5MurJV230C  | cggagcaatgcccgtgtgcaaacagatgggaccgg           | SCAM    |
| 3MurJV230C  | ccggtcccactctgttgcacacgcgcatgctccg            | SCAM    |
| 5MurJK231C  | gcaatgcccgtggtgtgcccagatgggaccggcg            | SCAM    |
| 3MurJK231C  | cgccggtcccactctggcacaccacgcgcatgctc           | SCAM    |
| 5MurJA236C  | gtgaaacagatgggaccgtgcatccttggcgtctctgtg       | SCAM    |
| 3MurJA236C  | cacagagacgccaaggatgcacggctcccactctgttcac      | SCAM    |
| 5MurJS241C  | ggcgatcctggcgtctgtgtgagcca                    | SCAM    |
| 3MurJS241C  | tggctcacacagacgccaaggatcggc                   | SCAM    |
| 5MurJV242C  | ccggcgatccttggcgtctctgacgccagatctc            | SCAM    |
| 3MurJV242C  | gagatctggctgcaagagacgccaaggatgcccgg           | SCAM    |
| 5MurJQ244C  | atccttggcgtctctgtgagctgcatctcctaatacatcaacacc | SCAM    |
| 3MurJQ244C  | gggttgatgattaaggagatgcagctcacagagacgccaaggat  | SCAM    |
| 5MurJL245C  | ggcgtctctgtgagccagtgctcctaatacatcaacac        | SCAM    |
| 3MurJL245C  | gtgttgatgattaaggagcactggctcacagagacgcc        | SCAM    |
| 5MurJS246C  | ctctgtagccagatctgcttaatacatcaacacca           | SCAM    |
| 3MurJS246C  | tgggttgatgattaagcagatctggctcacagag            | SCAM    |
| 5MurJN250C  | gccagatctcctaatacatctgcaccattttgctcgttcttc    | SCAM    |
| 3MurJN250C  | gaaacgaggcaaaaatggtgcagatgattaaggagatctggc    | SCAM    |
| 5MurJT251C  | cagatctcctaatacatcaactgcatttttgcctgcttcttgc   | SCAM    |
| 3MurJT251C  | gcaagaacgaggcaaaaatgcagttgatgattaaggagatctg   | SCAM    |
| 5MurJA254C  | cagatctcctaatacatcaacaccatttttgcctgcttcttctcc | SCAM    |
| 3MurJA254C  | ggaagcaagaacgagcaaaaatggtgtgatgattaaggagatctg | SCAM    |

| PRIMER NAME | SEQUENCE 5'-3'                                   | PURPOSE     |
|-------------|--------------------------------------------------|-------------|
| 5MurJF256C  | caacaccattttgcctcgtgtcttgcctccggtt               | SCAM        |
| 3MurJF256C  | aaccggaagcaagacacgaggcaaaaatggtgttg              | SCAM        |
| 5murJS259C  | cctcgtttcttgccttggttgcggtgtcttg                  | SCAM        |
| 3murJS259C  | caagacaccgaaccacaagcaagaaacgagg                  | SCAM        |
| 5MurJS263C  | gcttccggttcggtgtgttgatgtattacgcc                 | SCAM        |
| 3MurJS263C  | ggcgtaatacatccaacacaccgaaccggaagc                | SCAM        |
| 5MurJA268C  | ggttcggtgtcttggatgtattactgcgaccgcttaatggag       | SCAM        |
| 3MurJA268C  | ctccattaagcggcgcagtaatacatccaagacaccgaacc        | SCAM        |
| 5MurJD269C  | gtctggatgtattacgcctgcccttaatggagtccg             | SCAM        |
| 3MurJD269C  | cggaaactccattaagcggcaggcgtaatacatccaagac         | SCAM        |
| 5MurJD269A  | ttggatgtattacgccgcgcttaatggagtttc                | Mutagenesis |
| 3MurJD269A  | gaaactccattaagcgcggcgtaatacatccaa                | Mutagenesis |
| 5MurJR270C  | ggatgtattacgccgactgcttaatggagttccg               | SCAM        |
| 3MurJR270C  | cggaaactccattaagcagtcggcgtaatacatcc              | SCAM        |
| 5MurJR270A  | tgatgtattacgccgacgccttaatggagttccgctc            | Mutagenesis |
| 3MurJR270A  | gacggaaactccattaagcgcggcgtaatacatcca             | Mutagenesis |
| 5MurJM272C  | gtattacgccgaccgcttatgcgagttccgcccgggtg           | SCAM        |
| 3MurJM272C  | cacaccggacggaaactgcataagcggtcggcgtaatac          | SCAM        |
| 5MurJE273C  | tgtattacgccgaccgcttaatgtcttccgcccgggtg           | SCAM        |
| 3MurJE273C  | cacaccggacggaaagcacattaagcggtcggcgtaataca        | SCAM        |
| 5MurJE273A  | gaccgcttaatggctttccgctccg                        | Mutagenesis |
| 3MurJE273A  | ggcgtaatacatccaagacaccg                          | Mutagenesis |
| 5MurJP275C  | acgccgaccgcttaatggagtttgcctccggtgtgctg           | SCAM        |
| 3MurJP275C  | cagcacaccggagcaaaactccattaagcggtcggcgct          | SCAM        |
| 5MurJS276C  | cgcttaatggagttccgctgcgggtgtgctg                  | SCAM        |
| 3MurJS276C  | cagcacaccgcacggaaactccattaagcg                   | SCAM        |
| 5MurJG277C  | ggagttccgctcctgtgtgctggcgct                      | SCAM        |
| 3MurJG277C  | acgcccagcacacaggacggaaactcc                      | SCAM        |
| 5MurJV278C  | gagttccgctcggttgcctggcgctggcgctt                 | SCAM        |
| 3MurJV278C  | aagcgcacgccagcagcaaccggacggaaactc                | SCAM        |
| 5MurJV281C  | tccggtgtgctggcctgcgccttggcaccatt                 | SCAM        |
| 3MurJV281C  | aatggtgccaagcgcagccagccagcacaccgga               | SCAM        |
| 5MurJT285C  | gcgtggccttggctgcattttgctgcccgt                   | SCAM        |
| 3MurJT285C  | acggcagcaaaatgcagccaagcggcaccgc                  | SCAM        |
| 5MurJK293C  | tttgcctcgcctgcctgcagttttgccagtggaatc             | SCAM        |
| 3MurJK293C  | gattgccactggcaaaactgcacgacagcggcagcaaa           | SCAM        |
| 5MurJS297C  | gctgtcgaaaaagtttgcctgtggcaatcatgatgaata          | SCAM        |
| 3MurJS297C  | tattcatcatgattgccacaggcaaaactttcgacagc           | SCAM        |
| 5MurJE302C  | aaaagtttgcagtggaatcatgattgctacaaccggttgatggactg  | SCAM        |
| 3MurJE302C  | cagtcacataaacggttagcaatcatgattgccactggcaaaactttt | SCAM        |
| 5MurJG310C  | aaccggttgatggactggtgcttgcctttgttccctg            | SCAM        |
| 3MurJG310C  | caggaacaagacgcaagcaccagtcacataaacggtt            | SCAM        |
| 5MurJG326C  | agtgcggttgcgtgtgcattcttccggtc                    | SCAM        |
| 3MurJG326C  | gaccggaaagaatgcacaacgcaaccgact                   | SCAM        |
| 5MurJS335C  | ggtccggtgaccgttgcctgtccagtagcgt                  | SCAM        |
| 3MurJS335C  | accgactggaacaggcaaacggtaacggacc                  | SCAM        |
| 5MurJA344C  | ctgttccagtagcgttaattacctgcttgcgctgatgacc         | SCAM        |
| 3MurJA344C  | ggtcatcagcgcataaacgagtaaaattaccgactggaacag       | SCAM        |
| 5MurJT350C  | cgtttgatgcgctgatgtgccagcggcgtaattg               | SCAM        |
| 3MurJT350C  | caattaacgcccgctggcacatcagcgcataaacg              | SCAM        |
| 5MurJA353C  | cgctgatgaccagcgggtgcttaattgcctactcgtt            | SCAM        |
| 3MurJA353C  | accgagtaggcaattaagcaccgctgggtcatcagcg            | SCAM        |

| PRIMER NAME | SEQUENCE 5'-3'                                 | PURPOSE |
|-------------|------------------------------------------------|---------|
| 5MurJA356C  | cccagcgggcttaattgctactcgtggtgg                 | SCAM    |
| 3MurJA356C  | cccaccgagtagcaaatcaacgcccgctggg                | SCAM    |
| 5MurJV369C  | ggtttgattggcctgattgtagtgaatgcttgctcctgcttt     | SCAM    |
| 3MurJV369C  | aaagccaggagccaagcatttcactacaatcaggccaatcaaacc  | SCAM    |
| 5MurJF374C  | gttgctcctggctgttattcccgccagg                   | SCAM    |
| 3MurJF374C  | cctggcgggaataacagccaggagccaac                  | SCAM    |
| 5MurJD379C  | ctggctttattcccgcagtgcaataaacgccagtgaaaa        | SCAM    |
| 3MurJD379C  | tttactggcgttttaatgactggcgggaataaaagccag        | SCAM    |
| 5MurJV384C  | cgccaggacataaaacgccatgcaaaattgccatcgttacgctg   | SCAM    |
| 3MurJV384C  | cagcgtaacgatggcaatttgcacggcgttttaatgctcctggcg  | SCAM    |
| 5MurJA387C  | ggacataaaacgccagtgaaaattgcatcgttacgctgatttaac  | SCAM    |
| 3MurJA387C  | gttaaatcagcgtaacgatgcaaatcttactggcgttttaatgctc | SCAM    |
| 5MurJV389C  | aacgccagtgaaaattgccatcgtacgctgatttaacgcaattg   | SCAM    |
| 3MurJV389C  | caattgctgtaaaatcagcgtacagatggcaatttactggcgtt   | SCAM    |
| 5MurJG403C  | caattgatgaacctggcgtttattgtccgtgaaacatg         | SCAM    |
| 3MurJG403C  | catgttcaaccggacaaaataaacgccaggttcatcaattg      | SCAM    |
| 5MurJA408C  | ggcgtttattgctccgttgaacattgcccgtctgactt         | SCAM    |
| 3MurJA408C  | aagtgcacgcccgcaatgttcaaccggaccaataaacgcc       | SCAM    |
| 5MurJL429C  | gaatgcttctgcttactggcagtgccgtaagcagaaaaat       | SCAM    |
| 3MurJL429C  | atcttctgcttacggcactgccagtaaacgagcgaagcattc     | SCAM    |
| 5MurJT436C  | agttgcgtaagcagaaaaatctttgcccgcaaccgg           | SCAM    |
| 3MurJT436C  | ccgggttgcgggcaaaaagatttctgcttacgcaact          | SCAM    |
| 5MurJG440C  | ccccgcaaccctgctggatggcg                        | SCAM    |
| 3MurJG440C  | cgccatccagcagggttgcgggg                        | SCAM    |
| 5MurJG461C  | gatgtctggcgtgctttatgtatgtatcatatcatgcc         | SCAM    |
| 3MurJG461C  | ggcatgatatgtaacatacataaaagcagccagacatc         | SCAM    |
| 5MurJI465C  | gctgtcttttaggtatgttacattgcatgccggagtggtc       | SCAM    |
| 3MurJI465C  | gaccactccggcatgcaatgtaacatacctaaaagcagc        | SCAM    |
| 5MurJS470C  | tcatgccggagtggtgcttgggtaccatgcc                | SCAM    |
| 3MurJS470C  | gggcatggtacccaagcaccactccggcatga               | SCAM    |
| 5MurJT473C  | ggagtggtcattgggtgcatgccctggcgttta              | SCAM    |
| 3MurJT473C  | taaaccgagggtcatgcaaccaatgaccactcc              | SCAM    |
| 5MurJL481C  | gccctggcgtttactgcttgcacggcgtcgt                | SCAM    |
| 3MurJL481C  | acgaccgcatgcaacgcagtaaacgccagggc               | SCAM    |
| 5MurJG500C  | ctgcactggcggctactgtgcttcaaagtaaagaat           | SCAM    |
| 3MurJG500C  | attctttaacttgaagcacagtaccgccagtgag             | SCAM    |
| 5MurJV503C  | gcggtactgggctcaaatgtaaagaattgcccgccg           | SCAM    |
| 3MurJV503C  | cggcgggcaaatcttacattgaagcccagtagccg            | SCAM    |
| 5MurJR508C  | aaagtaaagaattgctgctgcccggagcgggtgaagg          | SCAM    |
| 3MurJR508C  | ccctacaccgtccggcaggcaaatcttaacttt              | SCAM    |
| 5MurJV511C  | tttcccggcggagctgtaaggggtcagacctg               | SCAM    |
| 3MurJV511C  | gcaggtcagaccttagcacgtccggcgggcaaa              | SCAM    |

**TABLE S3. SCAM results**

| aa change <sup>a,b</sup> | % NEM block <sup>c</sup> | % MTSES block | SCAM Result                | Location         |
|--------------------------|--------------------------|---------------|----------------------------|------------------|
| L3C                      | 100                      | 0             | NEM Blocked                | N-terminal tail  |
| K5C                      | 100                      | 0             | NEM Blocked                | N-terminal tail  |
| <b>T14C</b>              | <b>100</b>               | <b>100</b>    | <b>MTSES Blocked</b>       | <b>TMD1</b>      |
| <b>R18C</b>              | <b>100</b>               | <b>&lt;50</b> | <b>Partial MTSES Block</b> | <b>TMD1</b>      |
| V19C                     | <50                      | 0             | Partial NEM Block          | TMD1             |
| <b>L20C</b>              | <b>&gt;50</b>            | <b>0</b>      | <b>Partial NEM Block</b>   | <b>TMD1</b>      |
| A23C                     | <50                      | 0             | Partial NEM Block          | TMD1             |
| <b>R24C</b>              | <b>100</b>               | <b>0</b>      | <b>NEM Blocked</b>         | <b>TMD1</b>      |
| <b>D25C</b>              | <b>100</b>               | <b>100</b>    | <b>MTSES Blocked</b>       | <b>TMD1</b>      |
| <b>A26C</b>              | <b>100</b>               | <b>&lt;50</b> | <b>Partial MTSES Block</b> | <b>TMD1</b>      |
| <b>V28C</b>              | <b>100</b>               | <b>0</b>      | <b>NEM Blocked</b>         | <b>TMD1</b>      |
| <b>A29C</b>              | <b>100</b>               | <b>100</b>    | <b>MTSES Blocked</b>       | <b>TMD1</b>      |
| <b>R30C</b>              | <b>100</b>               | <b>100</b>    | <b>MTSES Blocked</b>       | <b>TMD1</b>      |
| A37C                     | 100                      | 100           | MTSES Blocked              | Periplasmic loop |
| D39C                     | 100                      | 100           | MTSES Blocked              | Periplasmic loop |
| <b>A44C</b>              | <b>100</b>               | <b>100</b>    | <b>MTSES Blocked</b>       | <b>TMD2</b>      |
| <b>K46C</b>              | <b>100</b>               | <b>&lt;50</b> | <b>Partial MTSES Block</b> | <b>TMD2</b>      |
| <b>L47C</b>              | <b>100</b>               | <b>&lt;50</b> | <b>Partial MTSES Block</b> | <b>TMD2</b>      |
| <b>N49C</b>              | <b>100</b>               | <b>&gt;50</b> | <b>Partial MTSES Block</b> | <b>TMD2</b>      |
| <b>R52C</b>              | <b>100</b>               | <b>100</b>    | <b>MTSES Blocked</b>       | <b>TMD2</b>      |
| <b>R53C</b>              | <b>100</b>               | <b>&lt;50</b> | <b>Partial MTSES Block</b> | <b>TMD2</b>      |
| <b>I54C</b>              | <b>100</b>               | <b>&lt;50</b> | <b>Partial MTSES Block</b> | <b>TMD2</b>      |
| <b>F55C</b>              | <b>100</b>               | <b>&lt;50</b> | <b>Partial MTSES Block</b> | <b>TMD2</b>      |
| <b>A56C</b>              | <b>100</b>               | <b>&gt;50</b> | <b>Partial MTSES Block</b> | <b>TMD2</b>      |
| <b>E57C</b>              | <b>100</b>               | <b>&gt;50</b> | <b>Partial MTSES Block</b> | <b>TMD2</b>      |
| <b>G58C</b>              | <b>100</b>               | <b>&lt;50</b> | <b>Partial MTSES Block</b> | <b>TMD2</b>      |
| <b>P66C</b>              | <b>100</b>               | <b>0</b>      | <b>NEM Blocked</b>         | <b>TMD2</b>      |
| <b>A69C</b>              | <b>100</b>               | <b>0</b>      | <b>NEM Blocked</b>         | <b>TMD2</b>      |
| E70C                     | 100                      | 0             | NEM Blocked                | Cytoplasmic loop |
| Y71C                     | 100                      | 0             | NEM Blocked                | Cytoplasmic loop |
| K72C                     | 100                      | 0             | NEM Blocked                | Cytoplasmic loop |
| D78C                     | 100                      | 0             | NEM Blocked                | Cytoplasmic loop |
| L95C                     | 0                        | 0             | Not Blocked                | TMD3             |
| V109C                    | <50                      | 0             | Partial NEM Block          | TMD3             |
| M111C                    | 100                      | 100           | MTSES Blocked              | Periplasmic loop |
| V112C                    | 100                      | 50            | Partial MTSES Block        | Periplasmic loop |
| D119C                    | 100                      | 100           | MTSES Blocked              | Periplasmic loop |
| A121C                    | 100                      | 100           | MTSES Blocked              | Periplasmic loop |
| S142C                    | 0                        | 0             | Not Blocked                | TMD4             |
| <b>A149C</b>             | <b>100</b>               | <b>0</b>      | <b>NEM Blocked</b>         | <b>TMD4</b>      |
| <b>F157C</b>             | <b>100</b>               | <b>0</b>      | <b>NEM Blocked</b>         | <b>TMD5</b>      |
| <b>A161C</b>             | <b>100</b>               | <b>0</b>      | <b>NEM Blocked</b>         | <b>TMD5</b>      |
| S170C                    | 0                        | 0             | Not Blocked                | TMD5             |
| A179C                    | 100                      | 100           | MTSES Blocked              | Periplasmic loop |
| A188C                    | 0                        | 0             | Not Blocked                | TMD6             |
| V198C                    | 0                        | 0             | Not Blocked                | TMD6             |
| L208C                    | 100                      | 0             | NEM Blocked                | Cytoplasmic loop |
| K209C                    | 100                      | 0             | NEM Blocked                | Cytoplasmic loop |
| V215C                    | 100                      | 0             | NEM Blocked                | Cytoplasmic loop |
| R218C                    | 100                      | 0             | NEM Blocked                | Cytoplasmic loop |

| aa change <sup>a,b</sup> | % NEM block <sup>c</sup> | % MTSES block | SCAM Result                | Location         |
|--------------------------|--------------------------|---------------|----------------------------|------------------|
| D223C                    | 100                      | 0             | NEM Blocked                | Cytoplasmic loop |
| <b>A224C</b>             | <b>100</b>               | <b>0</b>      | <b>NEM Blocked</b>         | <b>TMD7</b>      |
| <b>R228C</b>             | <b>100</b>               | <b>&lt;50</b> | <b>Partial MTSES Block</b> | <b>TMD7</b>      |
| <b>V230C</b>             | <b>100</b>               | <b>0</b>      | <b>NEM Blocked</b>         | <b>TMD7</b>      |
| <b>K231C</b>             | <b>100</b>               | <b>0</b>      | <b>NEM Blocked</b>         | <b>TMD7</b>      |
| <b>A236C</b>             | <b>100</b>               | <b>0</b>      | <b>NEM Blocked</b>         | <b>TMD7</b>      |
| <b>S241C</b>             | <b>100</b>               | <b>0</b>      | <b>NEM Blocked</b>         | <b>TMD7</b>      |
| <b>V242C</b>             | <b>100</b>               | <b>0</b>      | <b>NEM Blocked</b>         | <b>TMD7</b>      |
| <b>Q244C</b>             | <b>100</b>               | <b>0</b>      | <b>NEM Blocked</b>         | <b>TMD7</b>      |
| <b>I245C</b>             | <b>100</b>               | <b>0</b>      | <b>NEM Blocked</b>         | <b>TMD7</b>      |
| I249C                    | <50                      | 0             | Partial NEM Block          | TMD7             |
| <b>N250C</b>             | <b>100</b>               | <b>0</b>      | <b>NEM Blocked</b>         | <b>TMD7</b>      |
| <b>T251C</b>             | <b>100</b>               | <b>100</b>    | <b>MTSES Blocked</b>       | <b>TMD7</b>      |
| A254C                    | 100                      | 100           | MTSES Blocked              | Periplasmic loop |
| F256C                    | 100                      | 100           | MTSES Blocked              | Periplasmic loop |
| S259C                    | 100                      | 100           | MTSES Blocked              | Periplasmic loop |
| S263C                    | 100                      | 100           | MTSES Blocked              | Periplasmic loop |
| <b>A268C</b>             | <b>&gt;50</b>            | <b>&lt;50</b> | <b>Partial Block</b>       | <b>TMD8</b>      |
| <b>D269C</b>             | <b>100</b>               | <b>50</b>     | <b>Partial MTSES Block</b> | <b>TMD8</b>      |
| <b>R270C</b>             | <b>50</b>                | <b>&lt;50</b> | <b>Partial Block</b>       | <b>TMD8</b>      |
| <b>M272C</b>             | <b>&lt;50</b>            | <b>0</b>      | <b>Partial NEM Block</b>   | <b>TMD8</b>      |
| <b>E273C</b>             | <b>100</b>               | <b>&gt;50</b> | <b>Partial MTSES Block</b> | <b>TMD8</b>      |
| P275C                    | <50                      | 0             | Partial NEM Block          | TMD8             |
| <b>S276C</b>             | <b>100</b>               | <b>100</b>    | <b>MTSES Blocked</b>       | <b>TMD8</b>      |
| <b>G277C</b>             | <b>100</b>               | <b>50</b>     | <b>Partial MTSES Block</b> | <b>TMD8</b>      |
| <b>V278C</b>             | <b>100</b>               | <b>0</b>      | <b>NEM Blocked</b>         | <b>TMD8</b>      |
| <b>V281C</b>             | <b>100</b>               | <b>100</b>    | <b>MTSES Blocked</b>       | <b>TMD8</b>      |
| <b>T285C</b>             | <b>100</b>               | <b>0</b>      | <b>NEM Blocked</b>         | <b>TMD8</b>      |
| K293C                    | 100                      | 0             | NEM Blocked                | Cytoplasmic loop |
| S297C                    | 100                      | 0             | NEM Blocked                | Cytoplasmic loop |
| E302C                    | 100                      | 0             | NEM Blocked                | Cytoplasmic loop |
| G310C                    | 0                        | 0             | Not Blocked                | TMD9             |
| C314                     | 0                        | 0             | Not Blocked                | TMD9             |
| G326C                    | <50                      | 0             | Partial NEM Block          | TMD9             |
| S335C                    | <50                      | 0             | Partial NEM Block          | TMD9             |
| A344C                    | 100                      | 100           | MTSES Blocked              | Periplasmic loop |
| T350C                    | <50                      | 0             | Partial NEM Block          | TMD10            |
| A353C                    | <50                      | 0             | Partial NEM Block          | TMD10            |
| A356C                    | <50                      | 0             | Partial NEM Block          | TMD10            |
| V369C                    | 50                       | 0             | Partial NEM Block          | TMD10            |
| <b>F374C</b>             | <b>100</b>               | <b>0</b>      | <b>NEM Blocked</b>         | <b>TMD10</b>     |
| D379C                    | 100                      | 0             | NEM Blocked                | Cytoplasmic loop |
| <b>V384C</b>             | <b>100</b>               | <b>0</b>      | <b>NEM Blocked</b>         | <b>TMD11</b>     |
| <b>A387C</b>             | <b>100</b>               | <b>0</b>      | <b>NEM Blocked</b>         | <b>TMD11</b>     |
| V389C                    | <50                      | 0             | Partial NEM Block          | TMD11            |
| G403C                    | 100                      | 100           | MTSES Blocked              | Periplasmic loop |
| A408C                    | 100                      | 100           | MTSES Blocked              | Periplasmic loop |
| C419                     | 0                        | 0             | Not Blocked                | TMD12            |
| L429C                    | <50                      | 0             | Partial NEM Block          | TMD12            |
| T436C                    | 100                      | 0             | NEM Blocked                | Cytoplasmic loop |
| G440C                    | 100                      | 0             | NEM Blocked                | Cytoplasmic loop |

| <b>aa change</b> <sup>a,b</sup> | <b>% NEM<br/>block</b> <sup>c</sup> | <b>% MTSES<br/>block</b> | <b>SCAM Result</b> | <b>Location</b>  |
|---------------------------------|-------------------------------------|--------------------------|--------------------|------------------|
| G461C                           | 0                                   | 0                        | Not Blocked        | TMD13            |
| I465C                           | 100                                 | 100                      | MTSES Blocked      | Periplasmic loop |
| S470C                           | 100                                 | 100                      | MTSES Blocked      | Periplasmic loop |
| T473C                           | 100                                 | 100                      | MTSES Blocked      | Periplasmic loop |
| L481C                           | 0                                   | 0                        | Not Blocked        | TMD14            |
| G500C                           | 100                                 | 0                        | NEM Blocked        | C-terminal tail  |
| V503C                           | 100                                 | 0                        | NEM Blocked        | C-terminal tail  |
| R508C                           | 100                                 | 0                        | NEM Blocked        | C-terminal tail  |
| V511C                           | 100                                 | 0                        | NEM Blocked        | C-terminal tail  |

<sup>a</sup> C314 and C419 are native Cys

<sup>b</sup> Results in boldface indicate blocked residues (>50% NEM) predicted to reside within the membrane plane

<sup>c</sup> Percent reflects amount of detected protein not labeled by Mal-PEG

**TABLE S4. Comparison of TMD predictions of MurJ with our structural model**

**aa encompassing TMDs<sup>a</sup>**

| <b>TMD</b> | <b>TOPPRED</b> | <b>HMMTOP</b> | <b>TMHMM</b> | <b>SOSUI</b> | <b>MINNOU</b> | <b>This study</b> |
|------------|----------------|---------------|--------------|--------------|---------------|-------------------|
| 1          | 2-23           | 27-51         | 26-45        | 2-24         | 1-31          | 6-32              |
| 2          | 27 - 47        | 82-106        | 82-104       | 29-51        | 38-71         | 41-69             |
| 3          | 88 - 108       | 125-149       | 133-152      | 87-109       | 78-111        | 83-109            |
| 4          | 133 - 153      | 162-181       | 159-181      | 131-153      | 121-153       | 124-154           |
| 5          | 161 - 181      | 186-203       | 186-203      | 157-179      | 161-178       | 157-178           |
| 6          | 247 - 267      | 234-258       | 237-259      | 183-205      | 186-210       | 186-207           |
| 7          | 272 - 292      | 275-292       | 274-296      | 236-258      | 224-255       | 224-253           |
| 8          | 313 - 333      | 313-337       | 316-338      | 274-296      | 263-289       | 264-292           |
| 9          | 354 - 374      | 354-373       | 353-375      | 311-333      | 307-337       | 303-337           |
| 10         | 385 - 405      | 386-403       | 382-404      | 354-376      | 345-376       | 347-374           |
| 11         | 447 - 467      | 408-427       | 408-427      | 381-403      | 382-402       | 380-402           |
| 12         | 481 - 501      | 440-463       | 444-466      | 408-429      | 406-430       | 410-429           |
| 13         |                | 482-501       | 481-503      | 440-462      | 440-464       | 444-463           |
| 14         |                |               |              | 481-502      | 474-500       | 478-499           |

<sup>a</sup> TOPPRED, HMMTOP, TMHMM, SOSUI, MINNOU prediction servers (12-16).

## SUPPLEMENTAL REFERENCES

1. **Sievers F, Wilm A, Dineen D, Gibson TJ, Karplus K, Li W, Lopez R, McWilliam H, Remmert M, Soding J, Thompson JD, Higgins DG.** 2011. Fast, scalable generation of high-quality protein multiple sequence alignments using Clustal Omega. *Mol. Syst. Biol.* **7**:539.
2. **Waterhouse AM, Procter JB, Martin DM, Clamp M, Barton GJ.** 2009. Jalview Version 2--a multiple sequence alignment editor and analysis workbench. *Bioinformatics* **25**:1189-1191.
3. **He X, Szewczyk P, Karyakin A, Evin M, Hong WX, Zhang Q, Chang G.** 2010. Structure of a cation-bound multidrug and toxic compound extrusion transporter. *Nature* **467**:991-994.
4. **Lu M, Symersky J, Radchenko M, Koide A, Guo Y, Nie R, Koide S.** 2013. Structures of a Na<sup>+</sup>-coupled, substrate-bound MATE multidrug transporter. *Proc. Natl. Acad. Sci. U. S. A.* **110**:2099-2104.
5. **Tanaka Y, Hipolito CJ, Maturana AD, Ito K, Kuroda T, Higuchi T, Katoh T, Kato HE, Hattori M, Kumazaki K, Tsukazaki T, Ishitani R, Suga H, Nureki O.** 2013. Structural basis for the drug extrusion mechanism by a MATE multidrug transporter. *Nature* **496**:247-251.
6. **Roy A, Kucukural A, Zhang Y.** 2010. I-TASSER: a unified platform for automated protein structure and function prediction. *Nat. Protoc.* **5**:725-738.
7. **Zhang Y.** 2008. I-TASSER server for protein 3D structure prediction. *BMC bioinformatics* **9**:40.



8. **Baker NA, Sept D, Joseph S, Holst MJ, McCammon JA.** 2001. Electrostatics of nanosystems: application to microtubules and the ribosome. *Proc. Natl. Acad. Sci. U. S. A.* **98**:10037-10041.
9. **Yu D, Ellis HM, Lee EC, Jenkins NA, Copeland NG, Court DL.** 2000. An efficient recombination system for chromosome engineering in *Escherichia coli*. *Proc. Natl. Acad. Sci. U. S. A.* **97**:5978-5983.
10. **Casadaban MJ.** 1976. Transposition and fusion of the *lac* genes to selected promoters in *Escherichia coli* using bacteriophage *lambda* and *Mu*. *J. Mol. Biol.* **104**:541-555.
11. **Ruiz N, Gronenberg LS, Kahne D, Silhavy TJ.** 2008. Identification of two inner-membrane proteins required for the transport of lipopolysaccharide to the outer membrane of *Escherichia coli*. *Proc. Natl. Acad. Sci. U. S. A.* **105**:5537-5542.
12. **Cao B, Porollo A, Adamczak R, Jarrell M, Meller J.** 2006. Enhanced recognition of protein transmembrane domains with prediction-based structural profiles. *Bioinformatics* **22**:303-309.
13. **Claros MG, von Heijne G.** 1994. TopPred II: An improved software for membrane protein structure predictions. *CABIOS* **10**:685-686.
14. **Hirokawa T, Boon-Chieng S, Mitaku S.** 1998. SOSUI: classification and secondary structure prediction system for membrane proteins. *Bioinformatics* **14**:378-379.
15. **Krogh A, Larsson B, von Heijne G, Sonnhammer EL.** 2001. Predicting transmembrane protein topology with a hidden Markov model: application to complete genomes. *J. Mol. Biol.* **305**:567-580.
16. **Tusnady GE, Simon I.** 2001. The HMMTOP transmembrane topology prediction server. *Bioinformatics* **17**:849-850.
